# Supplementary material for: Diabetes-related distress and its associated factors among people with type 2 diabetes in Southeast Ethiopia: a cross-sectional study
Source: HighWire-hosted journal article supplement (doi:10.1136/bmjopen-2023-077693), 2024-01-01
Supplement: bmjopen-2023-077693supp002_data_supplement.pdf [file bmjopen-2023-077693supp002_data_supplement.pdf]

## **DABALATA I: Waraqaa odeeffannoo fi Hayyama odeeffannoo qabu**

### **Waraqaa odeeffannoo**

Akkam. Maqaan koo \_\_\_\_\_ akkasumas odeeffannoo walitti qabaa qorannoo Mulugeta fi kkf, hojjetoota akaadaamii fi qorattoota Yunivarsiitii Madda Walaabuutiin gaggeeffamaa jiru ti.

mata duree qorannoo “ *Dhiphina Dhukkuba Sukkaaraa* Waliin Walqabatee fi wantoota Waliin Walqabatan Dhukkubsattoota Dhukkuba Sukkaaraa Gosa 2ffaa Hospitaalota Baalee fi Zoonii Baalee Bahaatti Kunuunsa Hordoffii Irratti Argaman giddutti ” *mata duree jedhuun qorannoo ni gaggessan*. Qo'annoo kana irratti hirmaannaan keessan baay'ee jajjabeefama. Af-gaaffiin kun xumuramuudhaaf daqiiqaa 10-20 fudhata. Akka qaama qorannichaatti jalqaba socio demographic sana booda clinical factors, Dhimmoota dhunfaa fi *Dhiphina Dhukkuba Sukkaaraa* Waliin Walqabatee (DRD) isin gaafachuu barbaanna . Waan fedhe haa ta'u, odeeffannoon isin kennitan iccitii cimaa ta'ee kan eegamu yoo ta'u, miseensota garee qorannoo keenyaa malee nama biraatiif hin qoodamu. Qorannoo kana irratti hirmaachuun fedhii ofiitiin kan raawwatamu yoo ta'u, gaaffii deebii kennuu hin barbaanne kamiyyuu yoo isin mudata ta'e naaf himaa gara gaaffii itti aanutti nan ce'a; ykn yeroo barbaaddetti Af-gaaffii dhaabuu dandeessa. Haa ta'u malee yaadni keessan barbaachisaa waan ta'eef qorannoo kana irratti akka hirmaattan abdi qabna.

**Yeroo kanatti waa'ee qorannoo kanaa waan gaafachuu barbaadduu qabduu?**

**Gaaffii fi deebii kana amma jalqabuu danda'aa?**

**Mallattoo gaafataa: ----- Guyyaa: -----/-----/-----**

Deebii kennaan gaafiif waliigalee – Af-Gaaffii

Deebii kennaan gaafiif walii hin galee - xumura

**Odeeffannoo fi gaaffii dabalataaf teessoo quunnamtii qorataa muummee kunooti.**

**Mulugeetaa Adunyaawu(BSc, MSc).**

**Bilbila: +251931821570**

**E-mail: mulugetaadugnew@gmail.com irratti ergaa**

**Unka hayyamaa**

An \_\_\_\_\_ qorannoo Mulugeetaa fi kkf, hojjetoota akaadaamii fi qorattoota Yunivarsiitii Madda Walaabuutiin gaggeeffamuuf jiru, “Dhukkubsattoota *Dhukkuba* Sukkaaraa Gosa 2ffaa Hospitaalota Baalee fi Zoonii Baalee Bahaa, Kibba Baha Itoophiyaatti Kunuunsa Hordoffii irrati arkaman Keessatti Dhiphina Dhukkuba Sukkaaraa Waliin Walqabatee fi Qabxiilee Waliin Walqabatan Hospitaalota Baalee fi Zoonii Baalee Bahaa, Kibba Baha Itiyooophiyaa: *qorannoo qaxxaamuraa*”. Qo’annoo kana irratti hirmaachuun fedhiini, gaaffii gaafataan kamiifuu deebisuuf dirqama hin qabu gaaffilee deebisuun dhiisuun miidhaa tokkollee akka hin qabnee fi gaafficha deebisuun faayidaa addaa hin qabu akkasumas af-gaaffiin daqiiqaa 10- 20 kan fudhatu ta’a. Odeeffannoo armaan olitti ibsame hunda dhaga’ee gaaffii fi deebii kana irratti hirmaachuuf fedhii qaba.

**Maqaa gaafataa \_\_\_\_\_ Mallattoo \_\_\_\_\_ .**

(Mallattoo gaafataa deebii kennaan hayyama beekumsa qabu afaaniin kennuu isaa mirkaneessu)

**Gaaffii hikkaa afaan oromoo**  
**Odeeffannoo waliigalaa**

Tokkoon tokkoon gaaffiidhaaf, naannoo qubee deebii wajjin walsimutti geengoo tolchi; bakka duwwaa jiru deebii deebii kennaatiin guuti

1. Lakkoofsa koodii hirmaataa: \_\_\_\_\_ .

**Kutaa I: Amaloota hawaas-dimoogiraafii**

| S.Lakk | Gaaffii            | Deebii                                                                                                                                                            | Yaada |
|--------|--------------------|-------------------------------------------------------------------------------------------------------------------------------------------------------------------|-------|
| 101.   | Umurii             | _____ .                                                                                                                                                           |       |
| 102.   | Saala              | 1. Dhiira<br>2. Dhalaa                                                                                                                                            |       |
| 103    | Haala gaa'elaa     | 1. Qeenxee<br>2. Kan fuudhe<br>3. Kan hiikkaan<br>4. kan abbaan manaa/ haati manaa irraa du'e                                                                     |       |
| 104.   | Iddoo jireenyaa    | 1. Magaalaa<br>2. Baadiyyaa                                                                                                                                       |       |
| 105    | Haala barnootaa    | 1. Barnoota idilee hin qabu<br>2. Sadarkaa tokkoffaa (1-8)<br>. .<br>3. Sadarkaa Lammaffaa (9-12) .<br>4. Dippiloomaa<br>5. Digirii fi isaa ol                    |       |
| 106.   | Hojii dhukkubsataa | 1. Hojii dhabeeyyii<br>2. Soorama ba'e<br>3. Qaxarii<br>4. Haadha manaa manaa<br>5. Daldalaa<br>6. Hojii guyyaa guyyaa<br>7. Qotee bulaa<br>8. Barataa<br>9. Kaan |       |

**Kutaa II: Seenaa kilinikaala wajjin walqabatu**

| SNO | Gaaffilee                                                             | Deebii                                                                                                                |                                 |
|-----|-----------------------------------------------------------------------|-----------------------------------------------------------------------------------------------------------------------|---------------------------------|
| 201 | dhukkuba sukkaaraa akka qabdan eega bartan hagam geessan?             | _____ . waggoota                                                                                                      |                                 |
| 202 | Dhukkuboota waliin dhufan kan biraa qabdani                           | 1.Eeyyee<br>2.Lakk<br>3. hin beeku                                                                                    | Yoo LAKK ta'e gara G 204 deemaa |
| 203 | Yoo Q Lakk 202 eeyyee jette Dhukkuboota biroo kamtu, qabdaa           | 1.dhiibbaa dhiigaa<br>2.rakkina narvii<br>3.dhukkuba tiruu<br>4.rakkina onnee<br>5. Kan biroo (ibsi)<br>_____.        |                                 |
| 204 | Haala wal'aansa ammaa                                                 | 1. Insuliinii lilmoodhaan<br>2. Qoricha afaaniin fudhatamu<br>3. lamaan isaanii<br>4. fooyya'iinsa akkaataa jireenyaa |                                 |
| 205 | ji'oota 3 darban keessatti taatee harrina suukkaara dhiigaa           | 1.Eeyyee<br>2. Lakki                                                                                                  |                                 |
| 206 | Barnoota dhukkuba sukkaaraa wajjin walqabatu irratti hirmaattaniittuu | 1. Eeyyee<br>2. Lakki                                                                                                 |                                 |

**Kutaa III: Qabxiilee Dhuunfaa**

|     |                                                                                           |                                                                                                               |                                 |
|-----|-------------------------------------------------------------------------------------------|---------------------------------------------------------------------------------------------------------------|---------------------------------|
| 301 | Sochii qaamaa idilee                                                                      | 1. Eeyyee<br>2. Lakki                                                                                         |                                 |
| 302 | Nama bayyee sitti dhihaatu fi yeroo rakkoo isiniif qaqabu meeqa qabduu?                   | 1 ' tokkollee hin jiru '<br>2 ' 1 – 2 '<br>3 ' 3 – 5 '<br>4 ' 5+ ta'e                                         |                                 |
| 303 | Namoonni wanta ati hojjettuuf fedhii fi yaaddoo hangamii argisiisu?                       | 1 ' tokkollee hin jiru '<br>2 ' xiqqaa '<br>3 ' mirkanaa'aa hin taane '<br>4 ' tokko tokko '<br>5 ' baay'ee ' |                                 |
| 304 | Gargaarsi qabatamaan si barbaachisuu yoo qabaate ollaa irraa argachuun hammam salphaadha? | 1 ' baay'ee rakkisaa '<br>2 ' rakkisaa '<br>3 ' ni danda'ama '<br>4 ' salphaa '<br>5 ' baayyee salphaadha '   |                                 |
| 305 | Waggaa tokko darbe keessatti alkoolii dhugdee?                                            | 1. eeyyee<br>2. Lakki                                                                                         | Yoo Lakki ta'e gara Q307 deemaa |
| 306 | Alkoolii yeroo meeqa dhugda?                                                              | 1. Ji'atti hanga yeroo 4<br>2. Torbanitti yeroo 4 ol                                                          |                                 |
| 307 | Guyyoota torba darban keessatti sigaaraa xuuxeetaa?                                       | 1. Eeyyee<br>2. Lakki                                                                                         |                                 |

**Kutaa IV: Gaaffiiwwan dhiphina Dhukkuba Sukkaaraa wajjin walqabatan (DRD) .**

**Kallattii :** Dhukkuba sukkaaraa wajjin jiraachuun yeroo tokko tokko cimaa ta'uu danda'a. Dhukkuba sukkaaraa ilaalchisee rakkoollee fi rakkinni hedduun jiraachuu waan danda'aniif hamma isaanii garaagarummaa guddaa qabaachuu danda'a. Rakkoon rakkina xixiqqoo irraa kaasee hanga rakkoo

jireenyaa gurguddaa ta'uu danda'a. Rakkoowwan namoota dhukkuba sukkaaraa qaban mudachuu danda'an 17 armaan gaditti tarreeffamaniiru. Meeshaaleen tokkoon tokkoon isaanii ji'a darbee keessatti hammam si dhiphisuu ykn si dhiphisuu danda'u ilaaliitii lakkoofsa barbaachisaa ta'etti naannessi. Hubadhaa, meeshaan sun siif qofa dhugaa ta'uu isaa miti osoo hin taane, tokkoon tokkoon meeshaan jireenya kee keessatti hammam akka si dhiphisuu danda'u akka agarsiiftu si gaafachaa jirra. Wanti murtaa'e tokko siif rakkina ykn rakkina akka hin taane yoo sitti dhaga'ame, "1" irratti marsita. Yoo baay'ee si dhibe, "6" naannessuu dandeessa.

| Rakkoolee                                                                                                                            | Rakkoo Miti | Rakkoo xiqqoo | a Rakkoo giddu galeessaa | Hamma tokko Rakkoo Hamaa | Rakkoo Cimaa | Rakkoo Baay'ee Hamaa |
|--------------------------------------------------------------------------------------------------------------------------------------|-------------|---------------|--------------------------|--------------------------|--------------|----------------------|
| <b>Ba'aa miiraa (ED) .</b>                                                                                                           |             |               |                          |                          |              |                      |
| 1. Dhukkubni sukkaaraa guyyaa guyyaan humna sammuu fi qaama koo garmalee fudhachaa akka jiru natti dhaga'ama.                        | 1. 1.       | 2. 2.         | 3. 3.                    | 4. 4.                    | 5. 5.        | 6. 6.                |
| 2. Dhukkuba sukkaaraa wajjin jiraachuu yeroon yaadu aarii, sodaa fi/ykn dhiphinni natti dhagahama.                                   | 1. 1.       | 2. 2.         | 3. 3.                    | 4. 4.                    | 5. 5.        | 6. 6.                |
| 3 Dhukkubni sukkaaraa jireenya koo akka to'atu natti dhaga'ama.                                                                      | 1. 1.       | 2. 2.         | 3. 3.                    | 4. 4.                    | 5. 5.        | 6. 6.                |
| 4. Waan fedhes hojjedhus, rakkoolee hamaa yeroo dheeraa na mudatannin akkan xumuru natti dhaga'amu.                                  | 1. 1.       | 2. 2.         | 3. 3.                    | 4. 4.                    | 5. 5.        | 6. 6.                |
| 5 Gaaffilee dhukkuba sukkaaraa wajjin jiraachuun namatti dhaga'amu.                                                                  | 1. 1.       | 2. 2.         | 3. 3.                    | 4. 4.                    | 5. 5.        | 6. 6.                |
| <b>Dhiphina ogeessa fayyaatiin walqabatee dhufu (PD) .</b>                                                                           |             |               |                          |                          |              |                      |
| 6. Doktarri koo waa'ee dhukkuba sukkaaraa fi kunuunsa dhukkuba sukkaaraa gahaa akka hin beekne natti dhaga'amu.                      | 1. 1.       | 2. 2.         | 3. 3.                    | 4. 4.                    | 5. 5.        | 6. 6.                |
| 7. Akkaataa dhukkuba sukkaaraa koo itti to'adhu irratti hakiimni koo kallattii gahaa ifa ta'e akka naaf hin kennine natti dhaga'amu. | 1. 1.       | 2. 2.         | 3. 3.                    | 4. 4.                    | 5. 5.        | 6. 6.                |
| 8. Doktarri koo yaaddoo koo akka waan guddaatti akka                                                                                 | 1. 1.       | 2. 2.         | 3. 3.                    | 4. 4.                    | 5. 5.        | 6. 6.                |

|                                                                                                                                                                                                                     |       |       |       |       |       |       |
|---------------------------------------------------------------------------------------------------------------------------------------------------------------------------------------------------------------------|-------|-------|-------|-------|-------|-------|
| hin ilaalle natti dhaga'amu.                                                                                                                                                                                        |       |       |       |       |       |       |
| 9. Doktara waa'ee dhukkuba sukkaaraa koo yeroo hunda arguu danda'u akkan hin qabne natti dhaga'amu.                                                                                                                 | 1. 1. | 2. 2. | 3. 3. | 4. 4. | 5. 5. | 6. 6. |
| <b>Dhiphina sirna waliin walqabatee (RD) .</b>                                                                                                                                                                      |       |       |       |       |       |       |
| 10. Sukkaara dhiiga koo yeroo baayyee gahaa ta'ee akkan hin qoratne/madaalle natti dhaga'amu.                                                                                                                       | 1. 1. | 2. 2. | 3. 3. | 4. 4. | 5. 5. | 6. 6. |
| 11. Yeroo baayyee sirna/goocha dhukkuba sukkaaraa koo irratti akkan kufaa jiru natti dhaga'amu.                                                                                                                     | 1. 1. | 2. 2. | 3. 3. | 4. 4. | 5. 5. | 6. 6. |
| 12 Dandeettii dhukkuba sukkaaraa to'achuuf qabu guyyaa guyyaa irratti ofitti amanamummaa natti dhaga'amu dhabuu.                                                                                                    | 1. 1. | 2. 2. | 3. 3. | 4. 4. | 5. 5. | 6. 6. |
| 13. Karoora nyaataa gaarii tokkotti akkan hin maxxanne natti dhaga'amu.                                                                                                                                             | 1. 1. | 2. 2. | 3. 3. | 4. 4. | 5. 5. | 6. 6. |
| 14. dhukkuba sukkaaraa koo ofiif too'achaa itti fufuuf kaka'umsi natti dhaga'amu dhabuu.                                                                                                                            | 1. 1. | 2. 2. | 3. 3. | 4. 4. | 5. 5. | 6. 6. |
| <b>Dhiphina Namoota Gidduu (ID) .</b>                                                                                                                                                                               |       |       |       |       |       |       |
| 15.Hiriyooni ykn maatiin carraaqii of kunuunsuu koo gahaa ta'ee akka hin deggerre natti dhaga'amu (fkn sochiiwwan sagantaa koo wajjin wal faallessan karoorsuu, nyaata “dogongoraa” akkan nyaadhu na jajjabeessuu). | 1. 1. | 2. 2. | 3. 3. | 4. 4. | 5. 5. | 6. 6. |
| 16. Hiriyooni ykn maatiin dhukkuba sukkaaraa wajjin jiraachuun hammam rakkisaa ta'uu akka danda'u akka hin dinqisiifanne natti dhaga'amu.                                                                           | 1. 1. | 2. 2. | 3. 3. | 4. 4. | 5. 5. | 6. 6. |
| 17. Hiriyooni ykn maatiin deeggarsa miiraa ani barbaadu akka naaf hin kennine natti dhaga'amu.                                                                                                                      | 1. 1. | 2. 2. | 3. 3. | 4. 4. | 5. 5. | 6. 6. |
