# Supplementary material for: Diabetes-related distress and its associated factors among people with type 2 diabetes in Southeast Ethiopia: a cross-sectional study
Source: HighWire-hosted journal article supplement (doi:10.1136/bmjopen-2023-077693), 2024-01-01
Supplement: bmjopen-2023-077693supp004_data_supplement.pdf [file bmjopen-2023-077693supp004_data_supplement.pdf]

| Problems                                                                                                                                                                                 | Not a Problem | a slight Problem | a Moderate problem | Somewhat A Serious Problem | A Serious Problem | A Very Serious Problem |
|------------------------------------------------------------------------------------------------------------------------------------------------------------------------------------------|---------------|------------------|--------------------|----------------------------|-------------------|------------------------|
| <b>Emotional burden (ED)</b>                                                                                                                                                             |               |                  |                    |                            |                   |                        |
| 1. Feeling that diabetes is taking up too much of my mental and physical energy every day.                                                                                               | 56(6.5%)      | 327(38.2%)       | 143(16.7%)         | 213(24.9%)                 | 63(7.4%)          | 54(6.3%)               |
| 2. Feeling angry, scared, and/or depressed when I think about living with diabetes.                                                                                                      | 60(7.0%)      | 356(41.6%)       | 98(11.4%)          | 191(22.3%)                 | 95(11.1%)         | 56(6.5%)               |
| 3 Feeling that diabetes controls my life.                                                                                                                                                | 79(9.2%)      | 341(39.8%)       | 97(11.3%)          | 168(19.6%)                 | 105(12.3%)        | 66(7.7%)               |
| 4. Feeling that I will end up with serious long-term complications, no matter what I do.                                                                                                 | 84(9.8%)      | 375(43.8%)       | 63(7.4%)           | 160(18.7%)                 | 105(12.3%)        | 69(8.1%)               |
| 5 Feeling overwhelmed by the demands of living with diabetes.                                                                                                                            | 120(14.0%)    | 348(40.7%)       | 78(9.1%)           | 143(16.7%)                 | 93(10.9%)         | 74(8.6%)               |
| <b>Physician-related distress (PD)</b>                                                                                                                                                   |               |                  |                    |                            |                   |                        |
| 6. Feeling that my doctor doesn't know enough about diabetes and diabetes care.                                                                                                          | 377(44.0%)    | 244(28.5%)       | 127(14.8%)         | 61(7.1%)                   | 35(4.1%)          | 12(1.4%)               |
| 7. Feeling that my doctor doesn't give me clear enough directions on how to manage my diabetes.                                                                                          | 308(36.0%)    | 261(30.5%)       | 139(16.2%)         | 70(8.2%)                   | 45(5.3%)          | 33(3.9%)               |
| 8. Feeling that my doctor doesn't take my concerns seriously enough.                                                                                                                     | 241(28.2%)    | 317(37.0%)       | 131(15.3%)         | 88(10.3%)                  | 52(6.1%)          | 27(3.2%)               |
| 9. Feeling that I don't have a doctor who I can see regularly about my diabetes.                                                                                                         | 279(32.6%)    | 285(33.3%)       | 105(12.3%)         | 96(11.2%)                  | 57(6.7%)          | 34(4.0%)               |
| <b>Regimen-related distress (RD)</b>                                                                                                                                                     |               |                  |                    |                            |                   |                        |
| 10. Feeling that I am not testing my blood sugars frequently enough.                                                                                                                     | 139(16.2%)    | 319(37.3%)       | 96(11.2%)          | 194(22.7%)                 | 60(7.0%)          | 48(5.6%)               |
| 11. Feeling that I am often failing with my diabetes regimen.                                                                                                                            | 81(9.5%)      | 363(42.4%)       | 75(8.8%)           | 197(23.0%)                 | 71(8.3%)          | 69(8.1%)               |
| 12 Not feeling confident in my day-to-day ability to manage diabetes.                                                                                                                    | 63(7.4%)      | 384(44.9%)       | 66(7.7%)           | 176(20.6%)                 | 92(10.7%)         | 75(8.8%)               |
| 13. Feeling that I am not sticking closely enough to a good meal plan.                                                                                                                   | 58(6.8%)      | 363(42.4%)       | 91(10.6%)          | 162(18.9%)                 | 89(10.4%)         | 93(10.9%)              |
| 14. Not feeling motivated to keep up my diabetes self-management.                                                                                                                        | 102(11.9%)    | 324(37.9%)       | 88(10.3%)          | 160(18.7%)                 | 86(10.0%)         | 96(11.2%)              |
| <b>Interpersonal Distress (ID)</b>                                                                                                                                                       |               |                  |                    |                            |                   |                        |
| 15. Feeling that friends or family are not supportive enough of my self-care efforts (e.g. planning activities that conflict with my schedule, encouraging me to eat the "wrong" foods). | 102(11.9%)    | 323(37.7%)       | 85(9.9%)           | 159(18.6%)                 | 92(10.7%)         | 95(11.1%)              |

|                                                                                                |            |            |          |            |            |           |
|------------------------------------------------------------------------------------------------|------------|------------|----------|------------|------------|-----------|
| 16. Feeling that friends or family don't appreciate how difficult living with diabetes can be. | 117(13.7%) | 335(39.1%) | 71(8.3%) | 144(16.8%) | 101(11.8%) | 88(10.3%) |
| 17. Feeling that friends or family don't give me the emotional support that I would like.      | 115(13.4%) | 335(39.1%) | 79(9.2%) | 157(18.3%) | 95(11.1%)  | 75(8.8%)  |
