# Supplementary material for: Diabetes-related distress and its associated factors among people with type 2 diabetes in Southeast Ethiopia: a cross-sectional study
Source: HighWire-hosted journal article supplement (doi:10.1136/bmjopen-2023-077693), 2024-01-01
Supplement: bmjopen-2023-077693supp005_data_supplement.pdf [file bmjopen-2023-077693supp005_data_supplement.pdf]

Supplementary Table 1 Factors Associated with DRD Among Type 2 Diabetes Mellitus Patients Attending Hospitals in Southeast Ethiopia, 2023 (n = 856)

| Variables                     | Diabetes Distress |            | COR with 95% CI  | AOR with 95% CI  |
|-------------------------------|-------------------|------------|------------------|------------------|
|                               | Yes               | No         |                  |                  |
| <b>Age</b>                    |                   |            |                  |                  |
| 18-40                         | 84(35.7%)         | 151(64.3%) | 0.19(0.11,0.29)  | 1.35(0.55,3.31)  |
| 41-60                         | 280(56.8%)        | 213(43.2%) | 0.42(0.27,0.65)  | 1.95(0.88,4.31)  |
| >=61                          | 97(75.8%)         | 31(24.2%)  | 1                |                  |
| <b>Marital Status</b>         |                   |            |                  |                  |
| Married                       | 331(51.5%)        | 312(48.5%) | 0.29(0.15,0.58)  | 1.76(0.59,5.24)  |
| Single                        | 26(34.7%)         | 49(65.3%)  | 0.15(0.06,0.33)  | 2.16(0.58,7.96)  |
| Divorced                      | 64(73.6%)         | 23(26.4%)  | 0.77(0.34,1.74)  | 0.81(0.25,2.61)  |
| Others                        | 40(78.4%)         | 11(21.6%)  | 1                |                  |
| <b>Residence</b>              |                   |            |                  |                  |
| Rural                         | 191(70.5%)        | 80(29.5%)  | 2.79(2.05,3.79)  | 0.753(0.38,1.48) |
| Urban                         | 270(46.2%)        | 315(53.8%) | 1                |                  |
| <b>Educational Status</b>     |                   |            |                  |                  |
| No formal education           | 181(80.8%)        | 43(19.2%)  | 9.54(4.77,19.07) | 0.844(0.23,3.17) |
| Primary (1-8)                 | 141(55.5%)        | 113(44.5%) | 2.83(1.47,5.45)  | 0.565(0.18,1.82) |
| Secondary (9-12)              | 98(38.7%)         | 155(61.3%) | 1.43(0.74,2.77)  | 0.511(0.16,1.59) |
| Diploma                       | 26(34.2%)         | 50(65.8%)  | 1.18(0.55,2.55)  | 1.609(0.61,4.25) |
| Degree and above              | 15(30.6%)         | 34(69.4%)  | 1                |                  |
| <b>Occupation/employment</b>  |                   |            |                  |                  |
| Farmer                        | 93(70.5%)         | 39(29.5%)  | 4.27(2.56,7.15)  | 1.66(0.57,4.86)  |
| Merchant                      | 320(54.2%)        | 270(45.8%) | 2.12(1.44,3.13)  | 1.74(0.73,4.15)  |
| Governmental                  | 48(35.8%)         | 86(64.2%)  | 1                |                  |
| <b>Duration with diabetes</b> |                   |            |                  |                  |
| <5                            | 327(46.5%)        | 376(53.5%) | 0.12(0.08,0.2)   | 0.63(0.29,1.39)  |

|                                                |            |            |                   |                    |
|------------------------------------------------|------------|------------|-------------------|--------------------|
| >5                                             | 134(87.6%) | 19(12.4%)  | 1                 |                    |
| <b>Other co-morbidities</b>                    |            |            |                   |                    |
| Present                                        | 252(84.3%) | 47(15.7%)  | 8.93(6.26,12.74)  | 3.94(2.01,7.73) ** |
| Absent                                         | 209(37.5%) | 348(62.5%) | 1                 | 1                  |
| <b>Treatment regiment</b>                      |            |            |                   |                    |
| Insulin or combination                         | 174(64.2%) | 97(35.8%)  | 1.86(1.39,2.51)   | 0.63(0.37,1.07)    |
| Oral                                           | 287(49.1%) | 298(50.9%) | 1                 |                    |
| <b>Hypoglycemia Event in the last 3 months</b> |            |            |                   |                    |
| Yes                                            | 156(66.4%) | 79(33.6%)  | 2.05(1.49,2.79)   | 0.678(0.39,1.16)   |
| No                                             | 305(49.1%) | 316(50.9%) | 1                 |                    |
| <b>Education related to DM</b>                 |            |            |                   |                    |
| No                                             | 272(75.3%) | 89(24.7%)  | 4.95(3.67,6.68)   | 1.588(0.99,2.55)   |
| Yes                                            | 189(38.2%) | 306(61.8%) | 1                 |                    |
| <b>Routine physical activity</b>               |            |            |                   |                    |
| No                                             | 365(72.9%) | 136(27.1%) | 7.24(5.33,9.83)   | 2.22(1.36,3.63) ** |
| Yes                                            | 96(27.0%)  | 259(73.0%) | 1                 | 1                  |
| <b>Social support</b>                          |            |            |                   |                    |
| Poor                                           | 334(81.1%) | 78(18.9%)  | 17.13(6.77,43.32) | 4.41(1.62,12.03) * |
| Moderate                                       | 121(29.2%) | 293(70.8%) | 1.65(0.66,4.14)   | 1.31(0.49,3.52)    |
| Strong                                         | 6(20.0%)   | 24(80.0%)  | 1                 | 1                  |
| <b>Taking alcohol</b>                          |            |            |                   |                    |
| Yes                                            | 101(83.5%) | 20(16.5%)  | 5.26(3.19,8.68)   | 1.28(0.59,2.75)    |
| No                                             | 360(49.0%) | 375(51.0%) | 1                 |                    |
| <b>Smoking Status</b>                          |            |            |                   |                    |
| Yes                                            | 33(84.6%)  | 6(15.4%)   | 4.99(2.07,12.06)  | 1.31(0.33,5.18)    |

|                                       |            |            |                    |                   |
|---------------------------------------|------------|------------|--------------------|-------------------|
| No                                    | 428(52.4%) | 389(47.6%) | 1                  |                   |
| <b>Diabetes-related complications</b> |            |            |                    |                   |
| Present                               | 119(88.1%) | 16(11.9%)  | 8.24(4.79,14.17)   | 0.87(0.36,2.08)   |
| Absent                                | 342(47.4%) | 379(52.6%) | 1                  |                   |
| <b>Glycemic Control</b>               |            |            |                    |                   |
| Uncontrolled ( $\geq 130$ mg/dl)      | 363(84.2%) | 98(23.1%)  | 17.81(12.63,25.11) | 2.36(1.35,4.12) * |
| Controlled ( $< 130$ mg/dl)           | 68(15.8%)  | 327(76.9%) | 1                  | 1                 |
| <b>BMI (kg/m<sup>2</sup>)</b>         |            |            |                    |                   |
| Normal                                | 284(44.0%) | 361(56.0%) | 0.02(0.00,0.01)    | 0.16(0.02,1.42)   |
| Overweight                            | 135(80.4%) | 33(19.6%)  | 0.09(0.01,0.73)    | 0.29(0.03,2.62)   |
| Obesity                               | 42(97.7%)  | 1(2.3%)    | 1                  | 1                 |

**Note:** AOR adjusted odds ratio, BMI = weight (kg)/height (m)<sup>2</sup>, CI confidence interval, COR crude odds ratio, \* Variables significant with p-value $\leq 0.005$ , \*\* Variables significant with p-value $\leq 0.001$ .

Covariates adjusted for in the fully adjusted models: Age, marital status, residence, educational status, occupation/employment, duration with diabetes, other co-morbidities, treatment regiment, hypoglycemia Event in the last 3 months, education related to DM, routine physical activity, social support, taking alcohol, smoking status, diabetes-related complications, glycemic control, and BMI (kg/m<sup>2</sup>)
